# Supplementary material for: Lnc-TALC promotes O6-methylguanine-DNA methyltransferase expression via regulating the c-Met pathway by competitively binding with miR-20b-3p
Source: PubMed Central journal article supplement (PMC6499807; doi:10.1038/s41467-019-10025-2), 2019-05-03
Supplement: 41467_2019_10025_MOESM1_ESM.pdf [file 41467_2019_10025_MOESM1_ESM.pdf]

## SUPPLEMENTARY INFORMATION

Lnc-TALC promotes O<sup>6</sup>-methylguanine-DNA methyltransferase expression via regulating the c-Met pathway by competitively binding with miR-20b-3p

Wu et al.

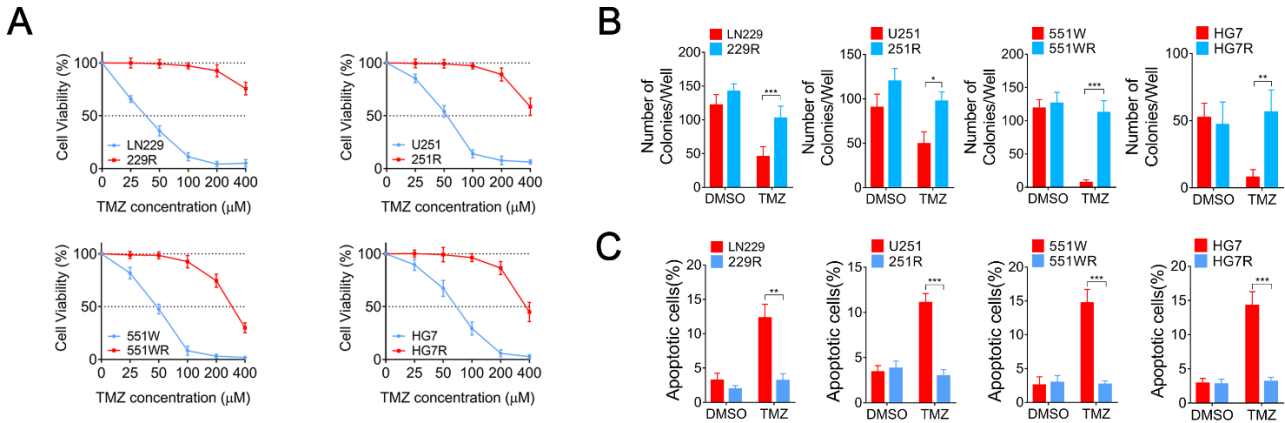

**Supplementary Figure 1. The establishment of TMZ-resistant GBM cells.**

A. CCK-8 assay of TMZ-resistant and parental GBM cells upon TMZ treatment at the indicated concentrations for 72 h (n=3).

B. Colony formation assay of TMZ-resistant and parental GBM cells upon TMZ treatment (100  $\mu\text{M}$ ) in a 6-well dish (300 cells per well) for 11 days (n=3). Representative images and the average number of colonies are shown.

C. Flow cytometric analysis of apoptosis in TMZ-resistant and parental GBM cells upon TMZ treatment (100  $\mu\text{M}$ ) for 72 h (n=3). Representative images and the average number of apoptotic cells are shown. Data are presented as the mean  $\pm$  S.D. P value was determined by Student's t test. Significant results were presented as NS (non-significant), \*P < 0.05, \*\*P < 0.01 or \*\*\*P < 0.001.

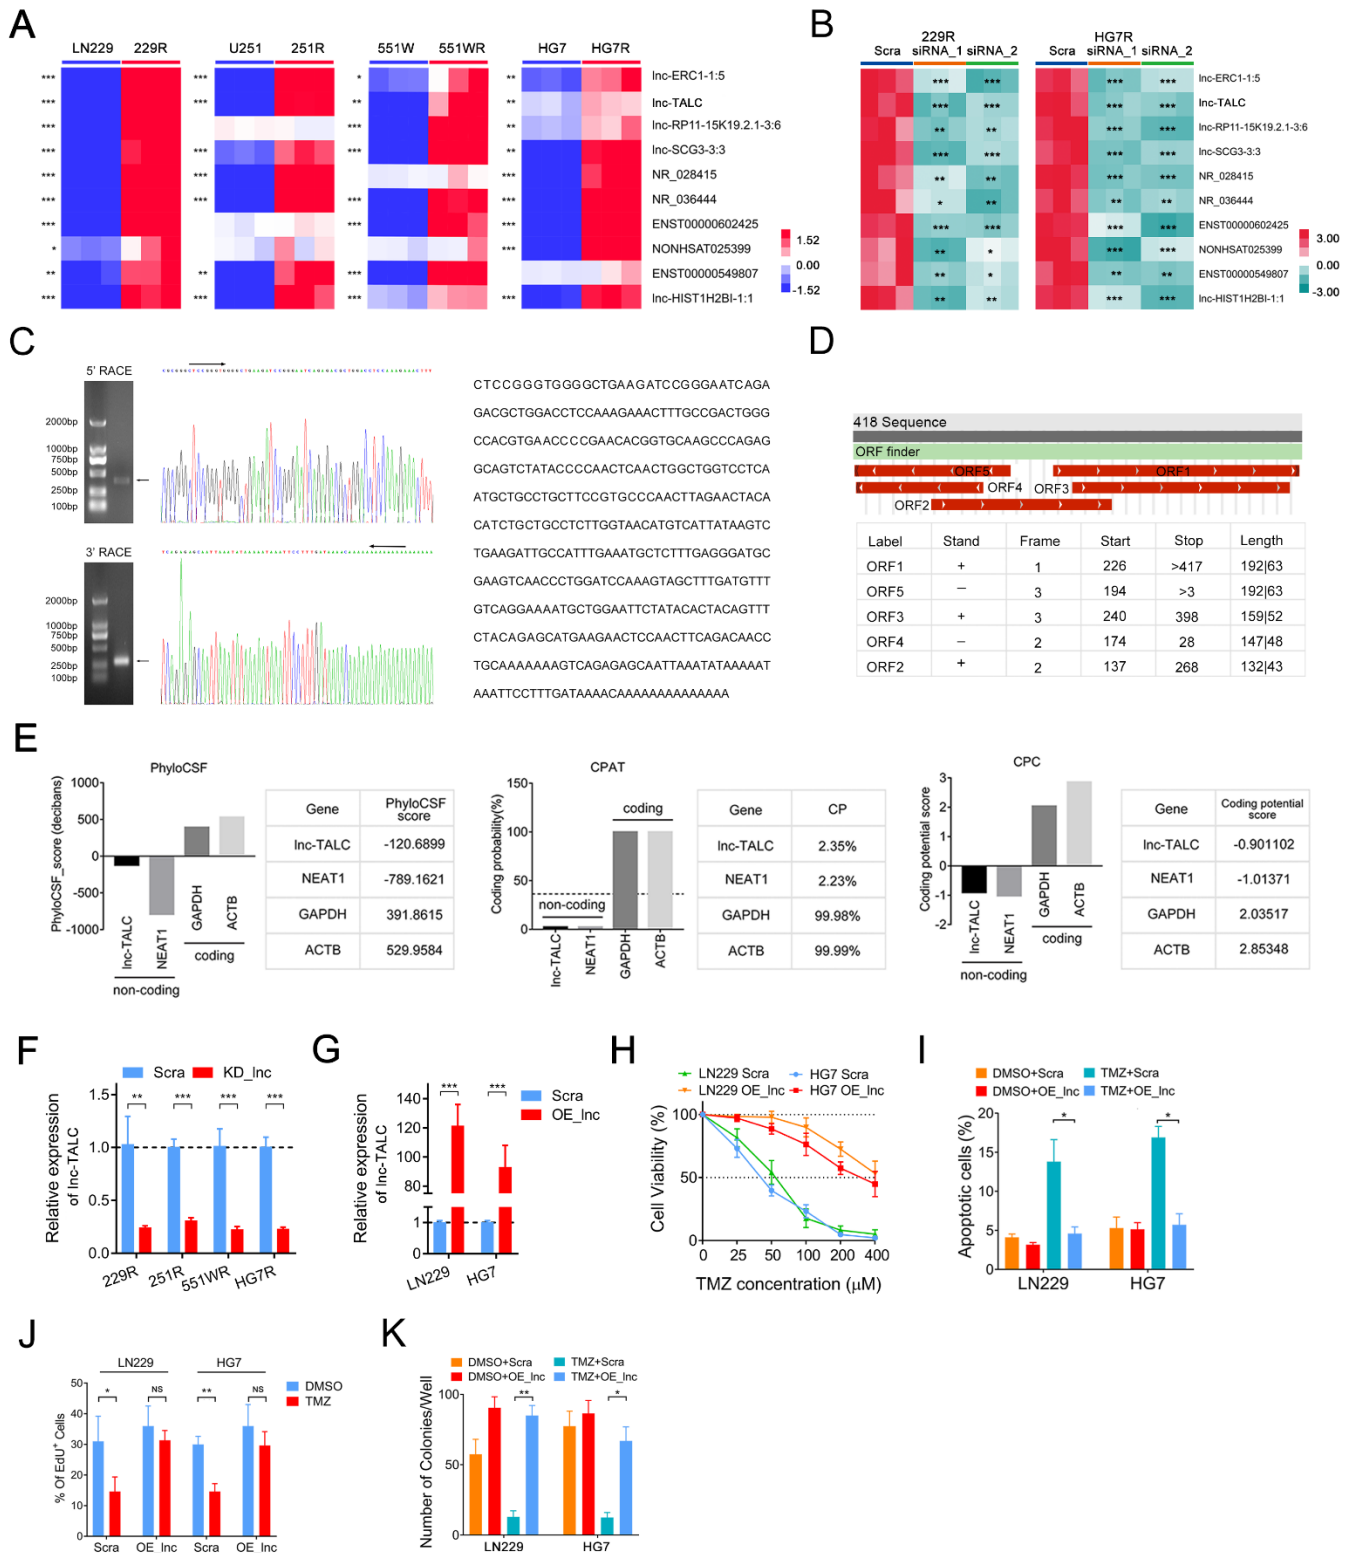

**Supplementary Figure 2. The identification and association with TMZ resistance of lnc-TALC in GBM cells.**

A. qRT-PCR analysis of the top 10 upregulated lncRNAs in TMZ-resistant and parental GBM cells.

B. qRT-PCR analysis validated the knockdown efficiency of the top 10 upregulated lncRNAs in TMZ-resistant GBM cells (n=3).

C. Left: Representative images of PCR products from the 5'RACE or 3'RACE procedure. The major PCR product is marked by an arrow. Middle: Sequencing of PCR products revealed the boundary of lnc-TALC

sequences. Right: The nucleotide sequence of full-length lnc-TALC.

D. Prediction of putative proteins encoded by lnc-TALC using ORF Finder.

E. Left: Coding potency of lnc-TALC sequence was analyzed using PhyloCSF. Middle: Coding potency of lnc-TALC sequence was analyzed using CPAT. Right: Coding potency of lnc-TALC sequence was analyzed using CPC. NEAT1 served as a control non-coding gene. GAPDH and  $\beta$ -actin served as control coding genes.

F. qRT-PCR analysis validated the knockdown of lnc-TALC in TMZ-resistant GBM cells.

G. qRT-PCR analysis validated the overexpression of lnc-TALC in parental GBM cells.

H. CCK-8 assay analysis revealed the effect of the lnc-TALC overexpression on parental GBM cells with TMZ treatment at the indicated concentrations for 72 h (n=3).

I. Cell apoptosis analysis revealed the effect of the lnc-TALC overexpression on the apoptosis of parental GBM cells with TMZ treatment (100  $\mu$ M) for 72 h (n=3). Representative images and the average number of apoptotic cells are shown.

J. The EdU assay showed the effect of lnc-TALC overexpression on the DNA replication activity of parental GBM cells with TMZ treatment (100  $\mu$ M) for 72 h (n=3). Representative images and the average number of EdU<sup>+</sup> cells are shown.

K. The colony formation assay showed the effect of the lnc-TALC overexpression on the growth of parental GBM cells with TMZ treatment (100  $\mu$ M) in a 6-well dish (300 cells per well) for 11 days (n=3). Representative images and the average number of colonies are shown. Data are presented as the mean  $\pm$  S.D. P value was determined by Student's t test. Significant results were presented as NS (non-significant), \*P < 0.05, \*\*P < 0.01 or \*\*\*P < 0.001.

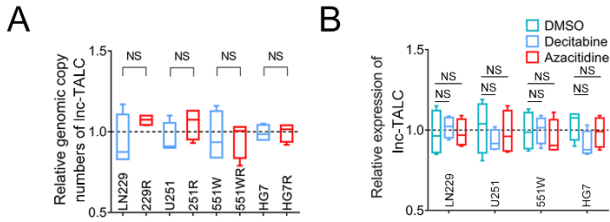

**Supplementary Figure 3. Copy number and DNA methylation alterations of lnc-TALC.**

A. qRT-PCR analysis of genomic copy numbers of lnc-TALC in TMZ-resistant and parental GBM cells.

B. qRT-PCR analysis of lnc-TALC in parental GBM cells treated with decitabine (0.5  $\mu$ M), azacitidine (10  $\mu$ M) or DMSO (0.3%). Data are presented as the mean  $\pm$  S.D. P value was determined by Student's t test.

Significant results were presented as NS (non-significant), \*P < 0.05, \*\*P < 0.01 or \*\*\*P < 0.001.

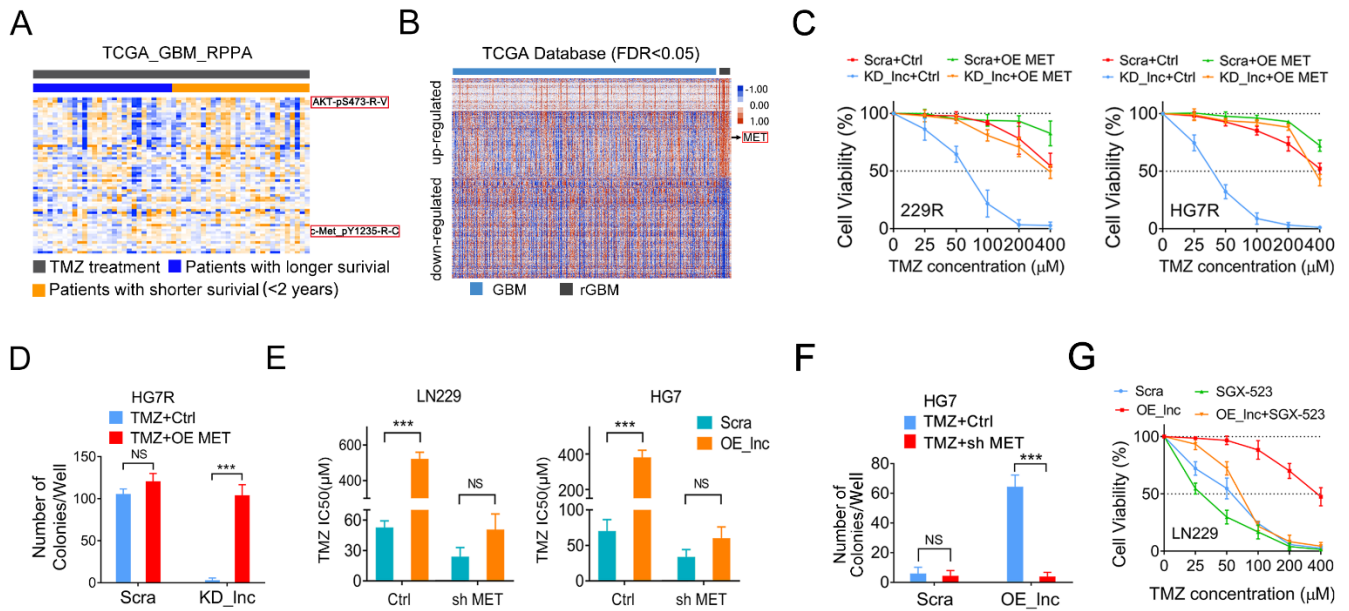

### Supplementary Figure 4. C-Met affects lnc-TALC- induced TMZ resistance in GBM.

A. Differentially expressed proteins were selected according to the overall survival time in the TCGA database.

B. In the TCGA database, differentially expressed genes between primary GBMs and recurrent GBMs were selected.

C. CCK-8 assay analysis of the effect of MET overexpression on 229R and HG7R cells after knocking down lnc-TALC upon TMZ treatment at the indicated concentrations for 72 h (n=3).

D. Colony formation assay of the effect of MET overexpression on HG7R cells after knocking down lnc-TALC upon TMZ treatment (100  $\mu$ M) in a 6-well dish (300 cells per well) for 11 days (n=3). Representative images and the average number of colonies are shown.

E. Determination of TMZ IC<sub>50</sub> by CCK-8 assay analysis of the effect of sh-MET on LN229 and HG7 after overexpressing lnc-TALC (n=3).

F. Colony formation assay of the effect of sh-MET on HG7 cells after overexpressing lnc-TALC upon TMZ treatment (100  $\mu$ M) in a 6-well dish (300 cells per well) for 11 days (n=3). Representative images and the average number of colonies are shown.

G. CCK-8 assay analysis of the effect of SGX-523 on LN229 cells after overexpressing lnc-TALC upon TMZ treatment at the indicated concentrations for 72 h (n=3). Data are presented as the mean  $\pm$  S.D. P value was determined by Student's t test. Significant results were presented as NS (non-significant), \*P < 0.05, \*\*P < 0.01 or \*\*\*P < 0.001.

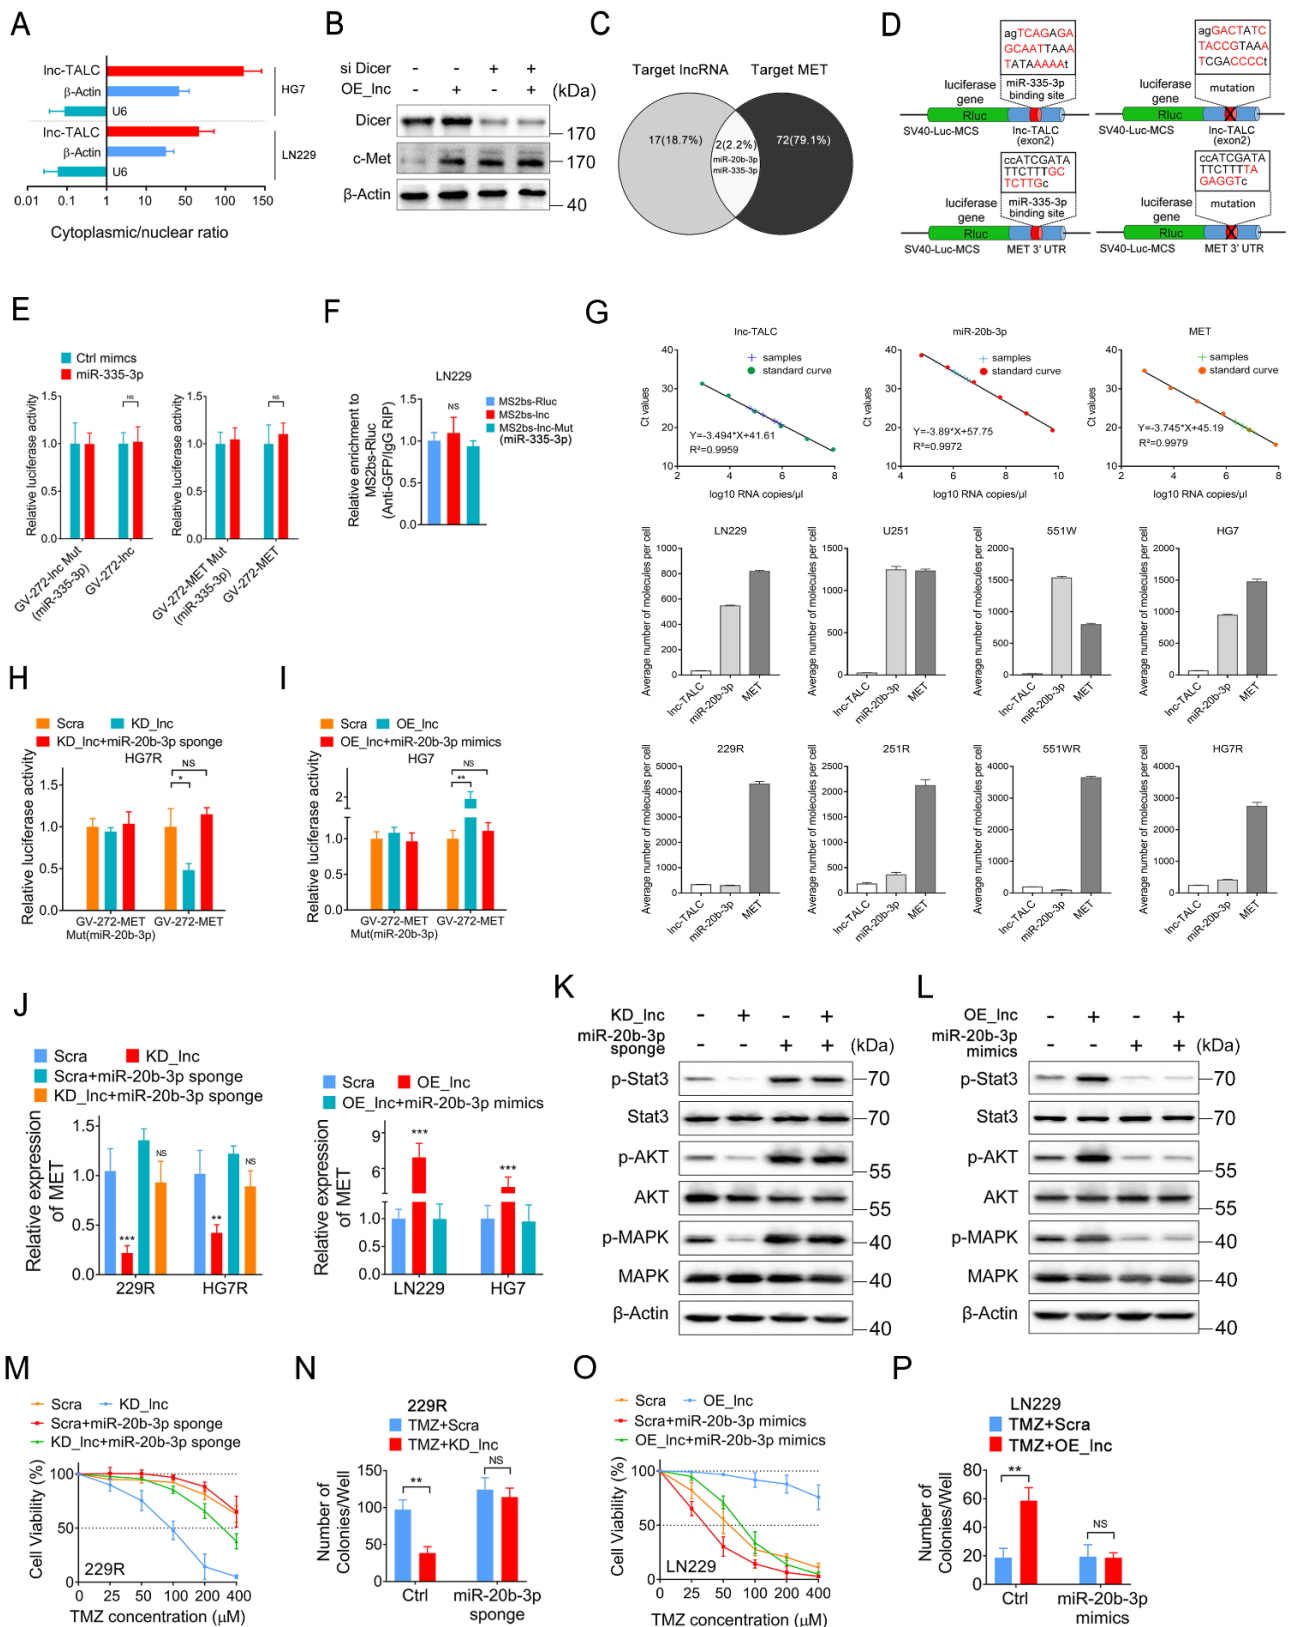

## Supplementary Figure 5. The discovery and identification of miRNAs targeting Inc-TALC and MET.

A. qRT-PCR analysis of the cytoplasmic/nuclear ratio of Inc-TALC,  $\beta$ -Actin and U6 SnRNA.

B. Western blot analysis of Dicer and c-Met in LN229 cells transfected with LV-Inc-TALC, si Dicer or scramble.

C. Overlap of potential miRNAs targeting both Inc-TALC and MET 3'UTR regions.

D. The predicted miR-335-3p binding sites on Inc-TALC and the 3'UTR of MET.

E. Luciferase activity of GV-272-lnc-TALC or GV-272-MET upon transfection of control mimics and miR-335-3p in 229R (n=3).

F. MS2-based RIP assay with anti-GFP antibody in LN229 cells 72 h after transfection with MS2bs-Rluc, MS2bs-lnc-TALC or MS2bs-lnc-TALC-Mut (n=3).

G. Upper: The standard curves for molecular numbers of lnc-TALC, miR-20b-3p and MET based on plasmids (lnc-TALC or MET) or synthetic polynucleotide (miR-20b-3p) with known amounts. Middle: qRT-PCR analysis combined with standard curves revealed that the average molecular numbers per cell for lnc-TALC, miR-20b-3p and MET in parental GBM cells. Lower: The average molecular numbers per cell for lnc-TALC, miR-20b-3p and MET in TMZ-resistant GBM cells.

H. Luciferase activity of GV-272-MET in HG7R after knocking down lnc-TALC upon transfection of a miR-20b-3p sponge (n=3).

I. Luciferase activity of GV-272-MET in HG7 after overexpressing lnc-TALC upon transfection of miR-20b-3p mimics (n=3).

J. Left: qRT-PCR analysis of MET in TMZ-resistant GBM cells after knocking down lnc-TALC upon transfection of a miR-20b-3p sponge (n=3). Right: qRT-PCR analysis of MET in parental GBM cells after overexpressing lnc-TALC upon transfection of miR-20b-3p mimics (n=3).

K. Western blot analysis of the indicated proteins in 229R after knocking down lnc-TALC upon transfection with a miR-20b-3p sponge.

L. Western blot analysis of indicated proteins in LN229 after overexpressing lnc-TALC upon transfection with miR-20b-3p mimics.

M. CCK-8 assay analysis of the effect of miR-20b-3p sponge on 229R after knocking down lnc-TALC upon TMZ treatment at the indicated concentrations for 72 h (n=3).

N. Colony formation assays of the effect of a miR-20b-3p sponge on 229R after knocking down lnc-TALC upon TMZ treatment (100  $\mu$ M) for 11 days (n=3). Representative images and the average number of colonies are shown.

O. CCK-8 assay analysis of the effect of miR-20b-3p mimics on LN229 after overexpressing lnc-TALC upon TMZ treatment at the indicated concentrations for 72 h (n=3).

P. Colony formation assays of the effect of miR-20b-3p mimics on LN229 after overexpressing lnc-TALC upon TMZ treatment (100  $\mu$ M) for 11 days (n=3). Representative images and the average number of colonies are shown. Data are presented as the mean  $\pm$  S.D. P value was determined by Student's t test or One-way ANOVA. Significant results were presented as NS (non-significant), \*P < 0.05, \*\*P < 0.01 or \*\*\*P < 0.001.



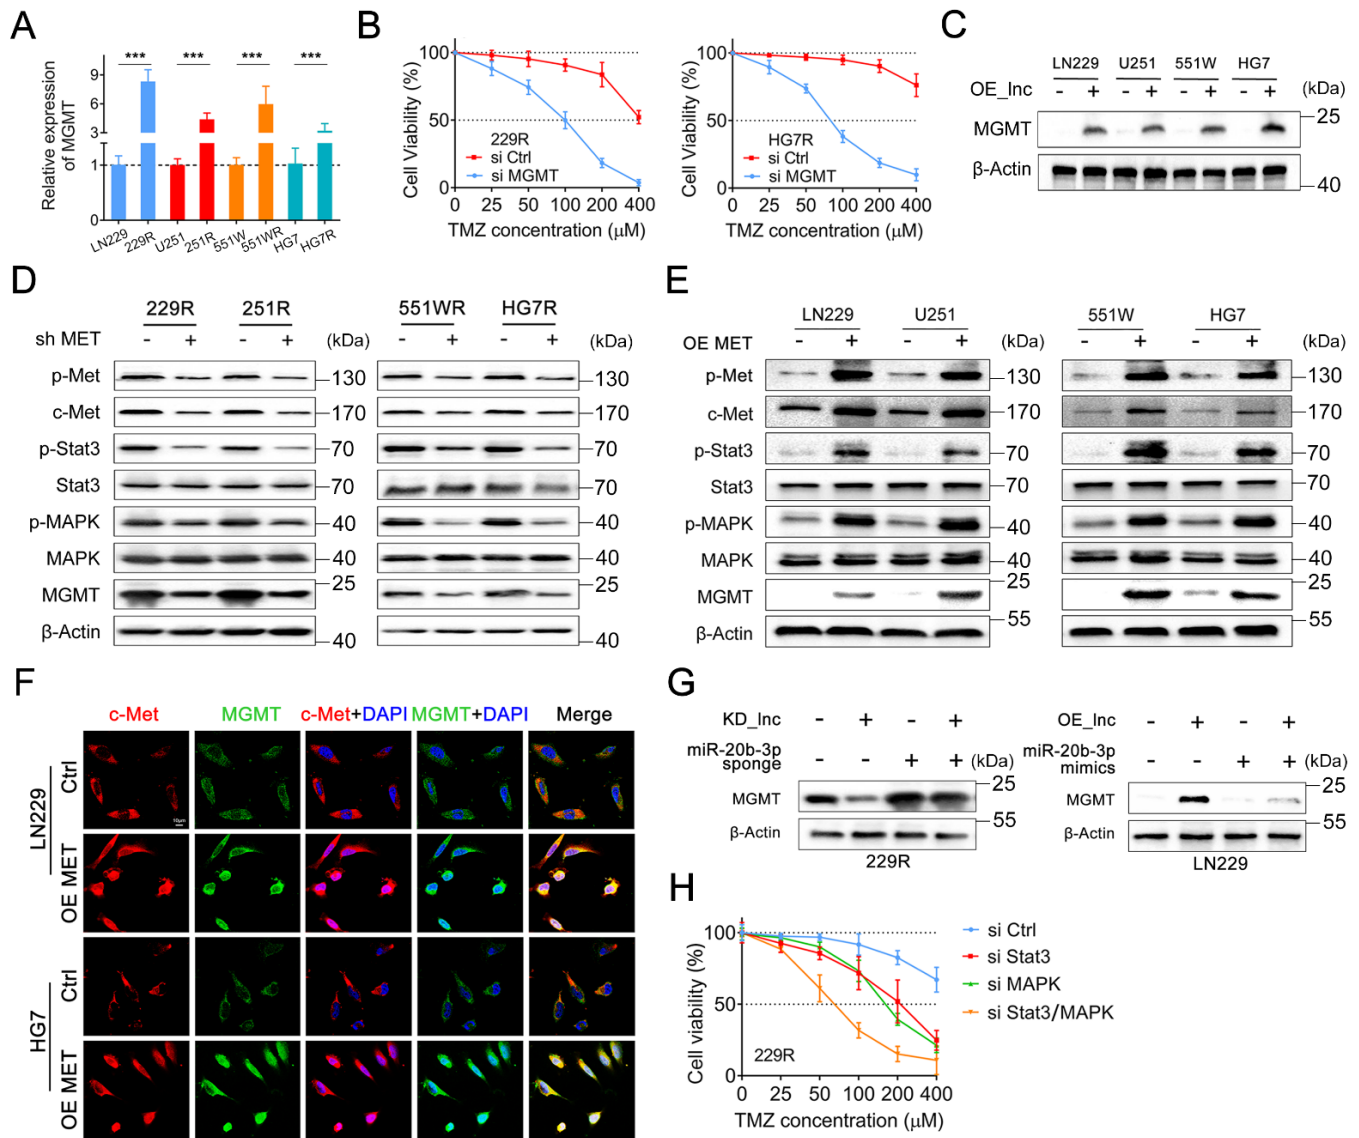

## Supplementary Figure 6. C-Met is involved in MGMT-induced TMZ resistance of GBM.

A. qRT-PCR analysis of MGMT expression in TMZ-resistant and parental GBM cells.

B. CCK-8 assay analysis of TMZ-resistant GBM cells transfected with si-MGMT and si-control upon TMZ treatment at the indicated concentrations for 72 h (n=3).

C. Western blot analysis of MGMT expression in parental GBM cells transfected with LV-Inc-TALC.

D. Western blot analysis of the indicated protein in TMZ-resistant GBM cells transfected with sh-MET.

E. Western blot analysis of the indicated protein in parental GBM cells transfected with MET and scramble plasmid.

F. Immunofluorescence analysis of MGMT and c-Met in parental GBM cells transfected with MET and scramble plasmid. The nuclei were stained with DAPI. Scale bar=10 μm.

G. Western blot analysis of MGMT in 229R after knocking down Inc-TALC upon transfection with a miR-20b-3p sponge and in LN229 after overexpressing Inc-TALC upon transfection with miR-20b-3p mimics.

H. CCK-8 assay analysis of si-Stat3, si-MAPK, si-Stat3/MAPK and control in TMZ-resistant GBM cells upon TMZ treatment at the indicated concentrations for 72 h (n=3). Data are presented as the mean ± S.D. P value

was determined by Student's t test. Significant results were presented as NS (non-significant), \*P < 0.05, \*\*P < 0.01 or \*\*\*P < 0.001.

A

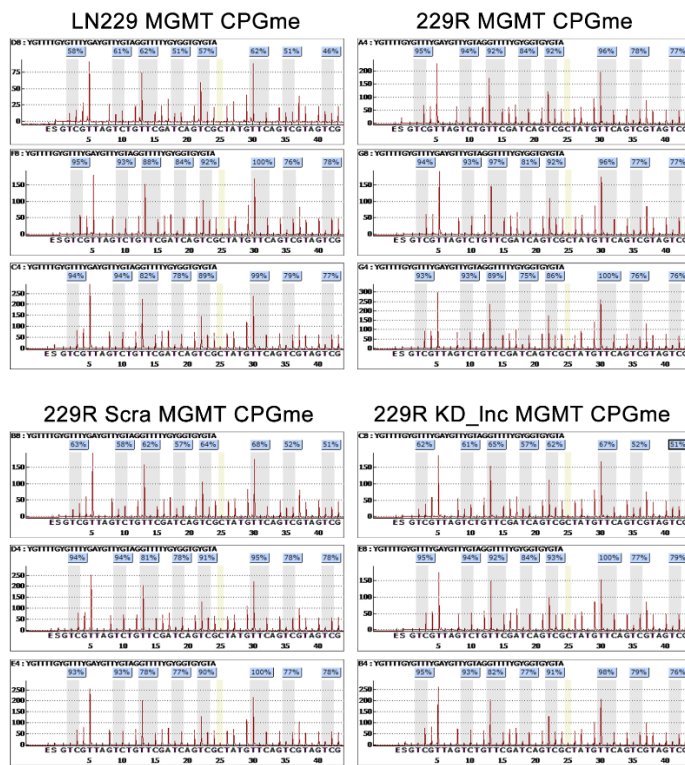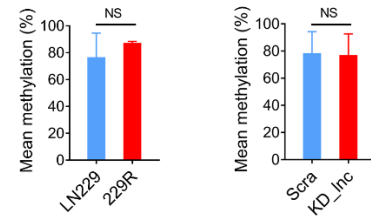

B

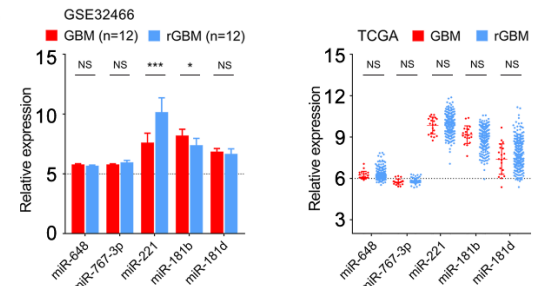

C

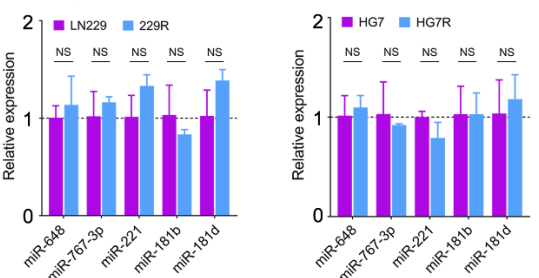

D

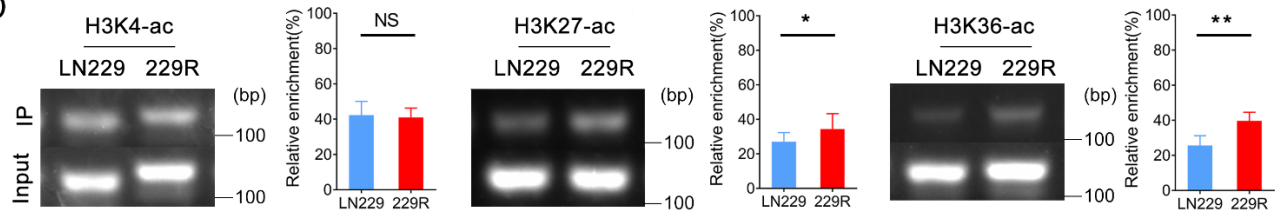

E

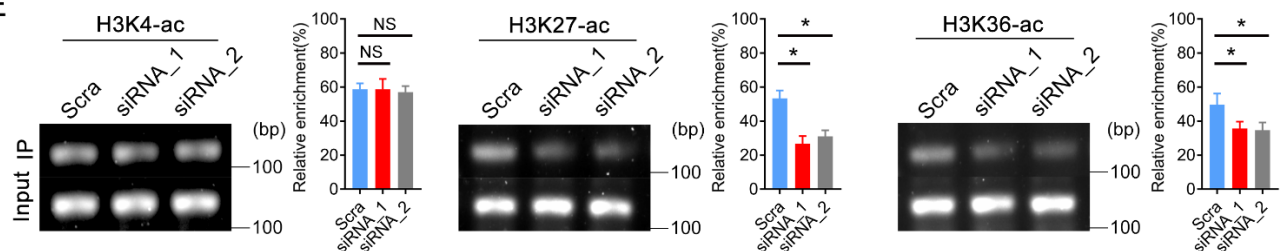

**Supplementary Figure 7. The exploration of MGMT regulation in TMZ-resistant GBM cells.**

A. Left: Validation of MGMT promoter methylation levels by pyrosequencing in LN229 and 229R cells (upper). Validation of MGMT promoter methylation levels by pyrosequencing in 229R after knocking down Inc-TALC (lower). Representative images and the average levels of MGMT promoter methylation (right) are shown.

B. The indicated relative miRNA expression levels were analyzed in the GSE32466 (left) and TCGA (right) databases.

C. qRT-PCR analysis of the indicated miRNA in parental and TMZ-resistant GBM cells.

D. ChIP assay of the enrichment of H3K4ac, H3K27ac and H3K36ac in the MGMT promoter region normalized to IgG in LN229 and 229R GBM cells (n=3).

E. ChIP assay of the enrichment of H3K4ac, H3K27ac and H3K36ac in the MGMT promoter region normalized to IgG in 229R GBM cells transfected with si-Stat3 or scramble. Data are presented as the mean  $\pm$  S.D. P value was determined by Student's t test. Significant results were presented as NS (non-significant), \*P < 0.05, \*\*P < 0.01 or \*\*\*P < 0.001.

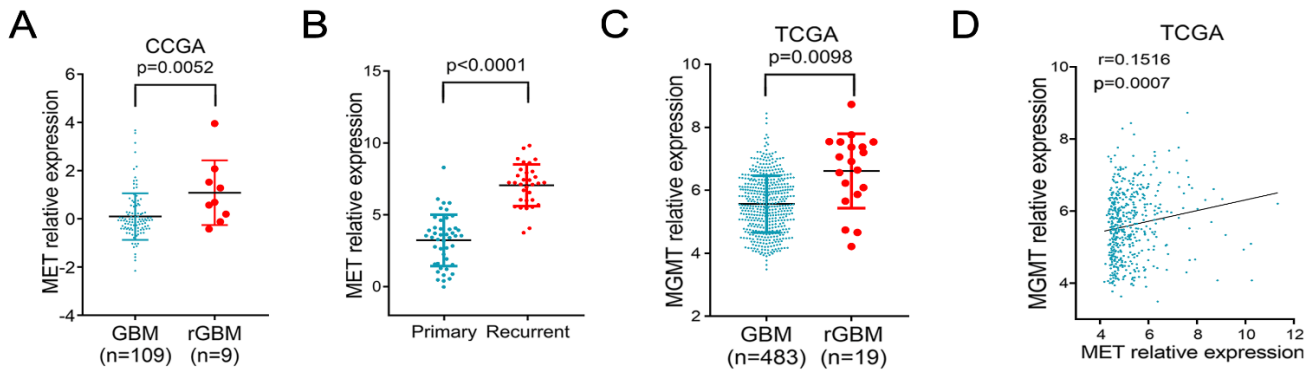

**Supplementary Figure 8. MET and MGMT are responsible for the recurrence of GBMs patients.**

- A. MET relative expression was analyzed between primary and recurrent GBMs in the CCGA database.
- B. qRT-PCR assay analysis of MET relative expression between primary and recurrent GBM samples.
- C. MGMT relative expression was analyzed between primary and recurrent GBMs in the TCGA database.
- D. Pearson correlation analysis between MGMT and MET expression levels in the TCGA database. Data are presented as the mean  $\pm$  S.D. P value was determined by Student's t test or Pearson's correlation test. Significant results were presented as NS (non-significant), \*P < 0.05, \*\*P < 0.01 or \*\*\*P < 0.001.

**Figure 2G**

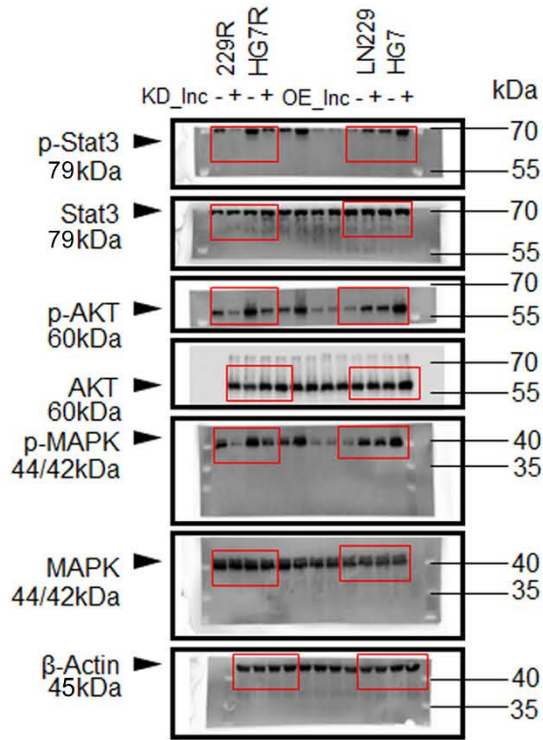

**Figure 3D**

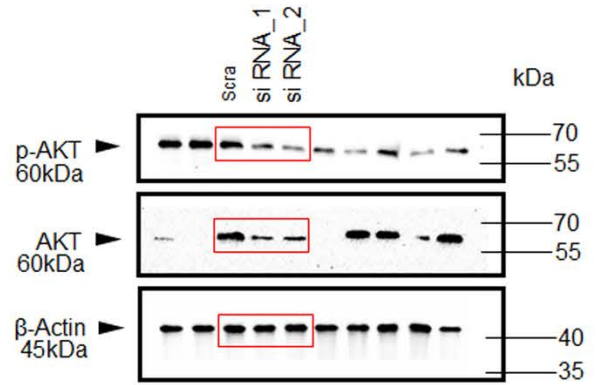

**Figure 3E**

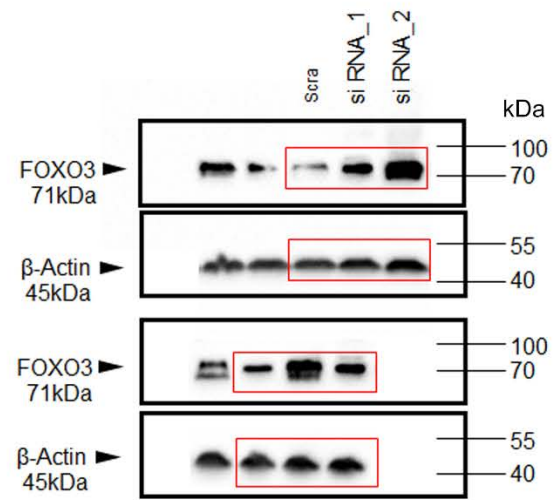

**Figure 3F**

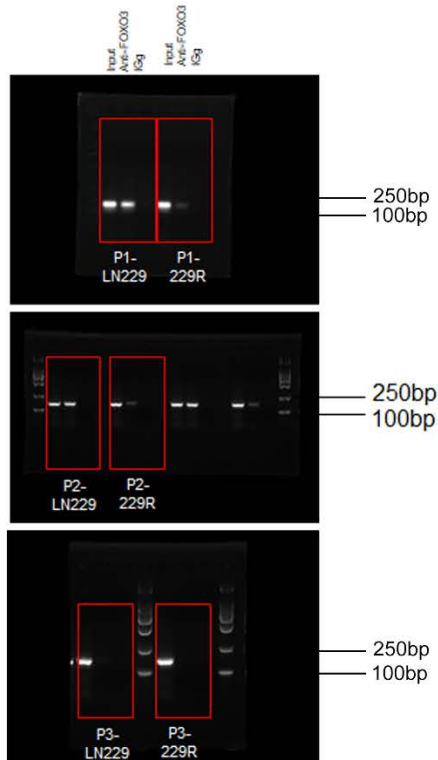

**Figure 4B**

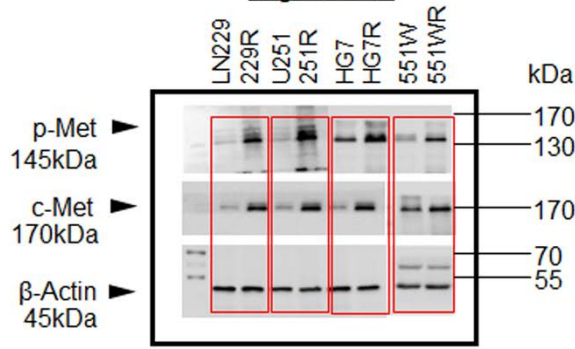

**Figure 4D**

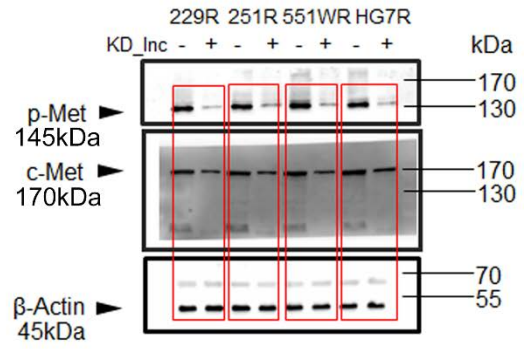

**Figure 4F**

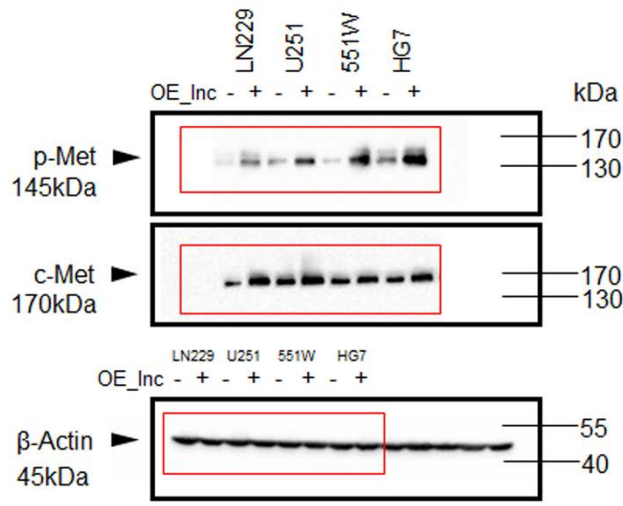

**Figure 4H**

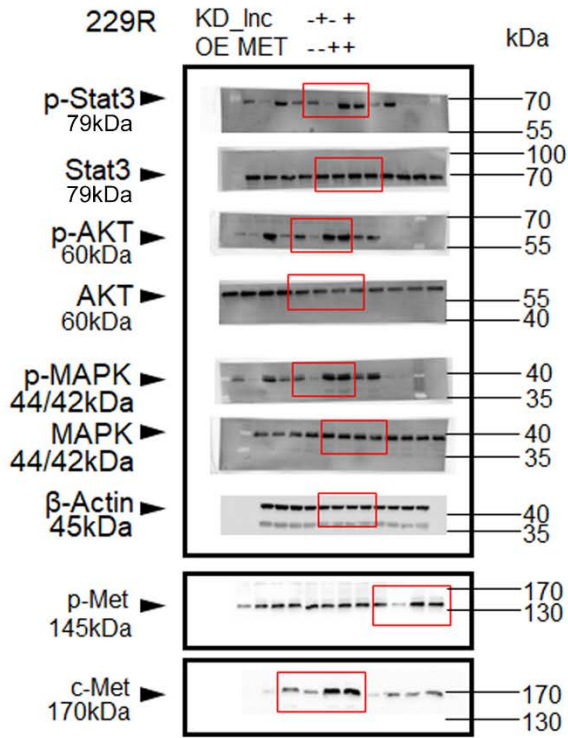

LN229

**Figure 4J**

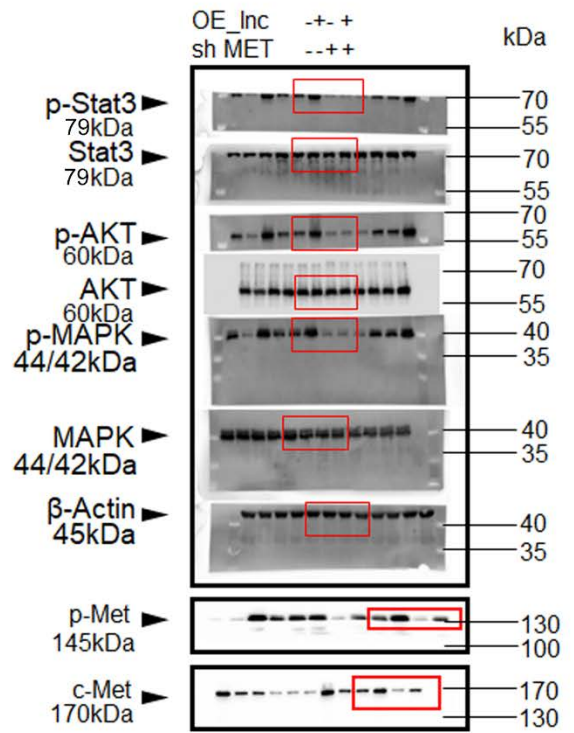

**Figure 4L**

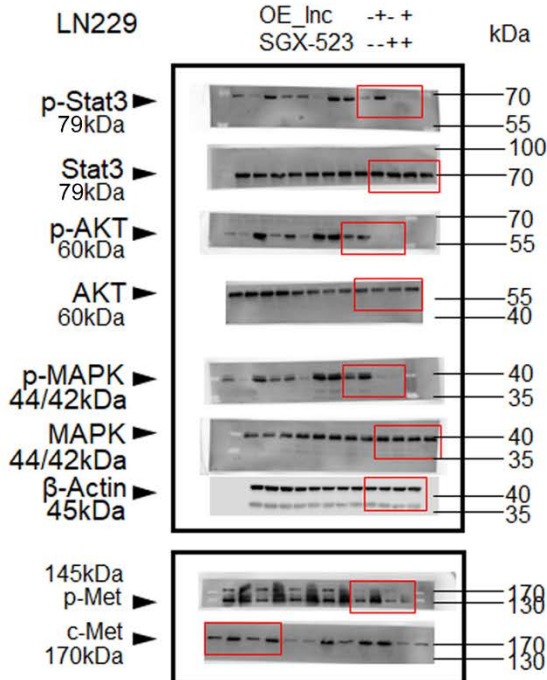

**Figure 5G**

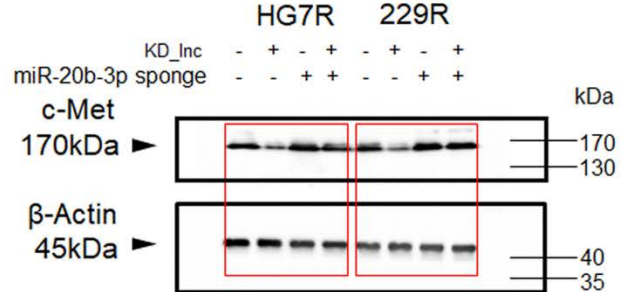



**Figure 5H**

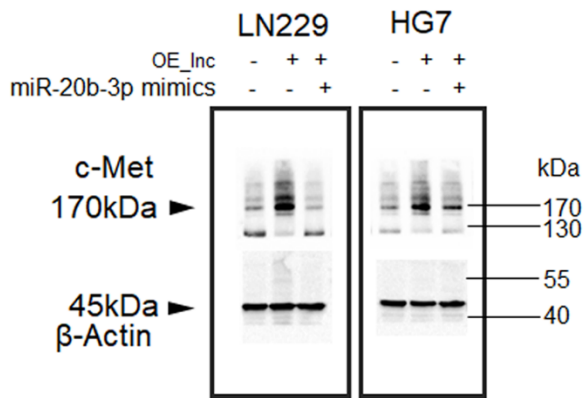

**Figure 6A**

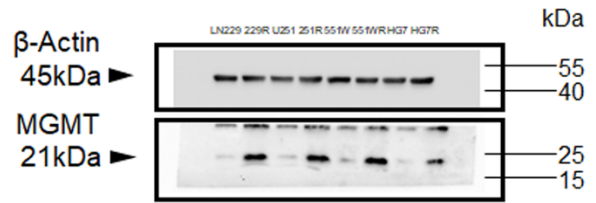

**Figure 6B**

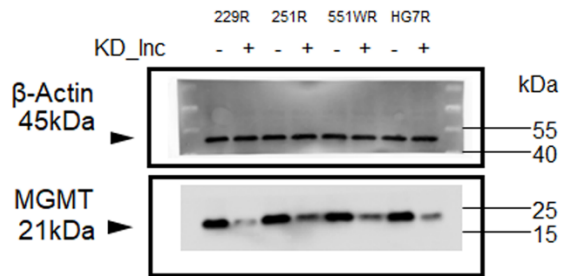

**Figure 6D**

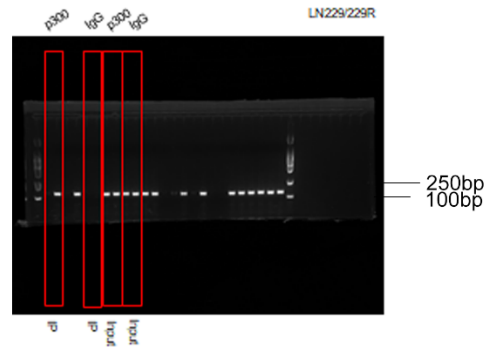

**Figure 6E**

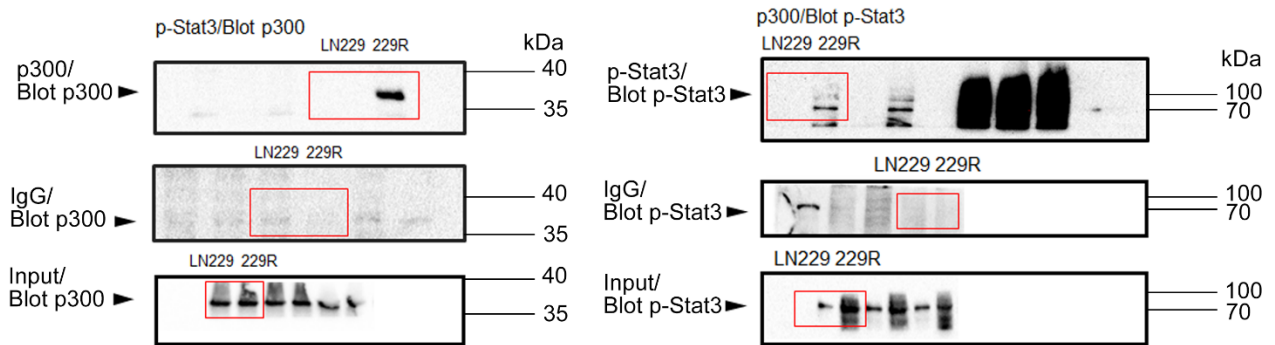

**Figure 6F**

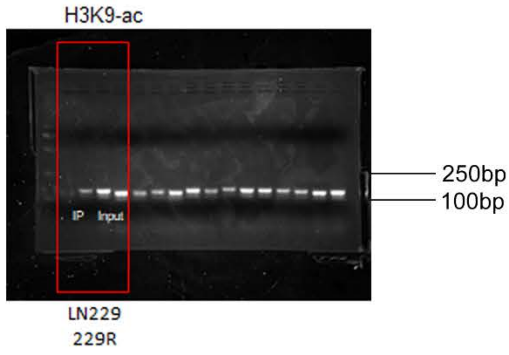

**Figure 6G**

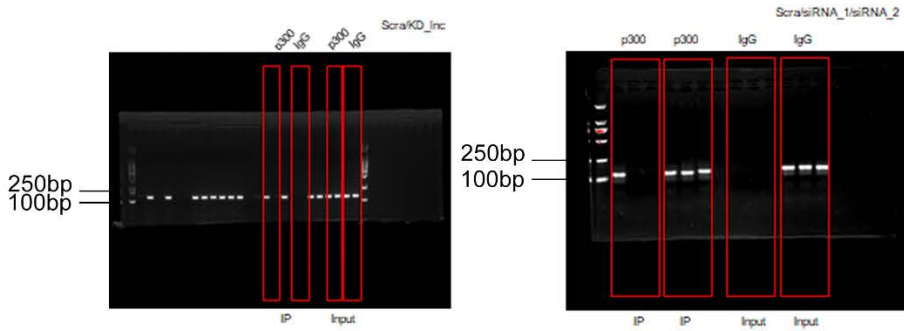

**Figure 6H**

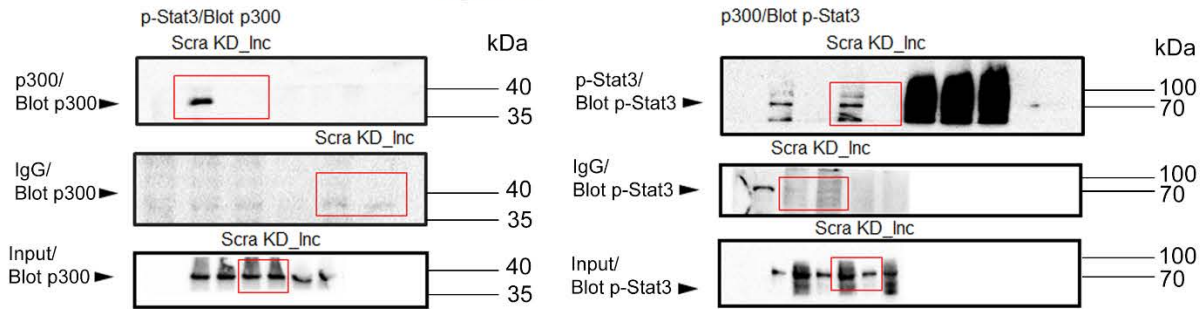

**Figure 6I**

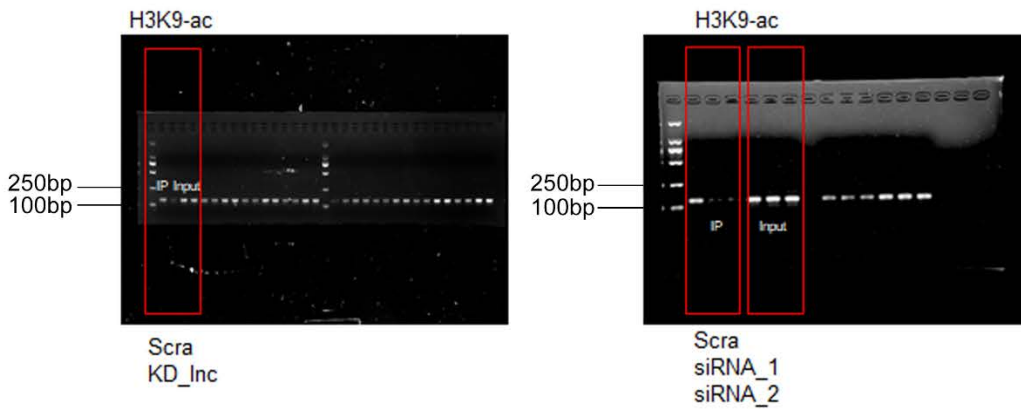

**Figure 8E**

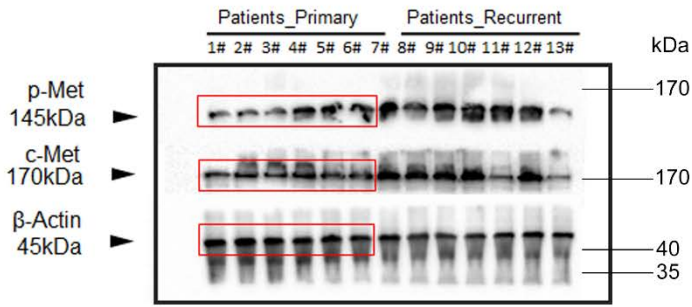

**Supplementary Figure 5B**

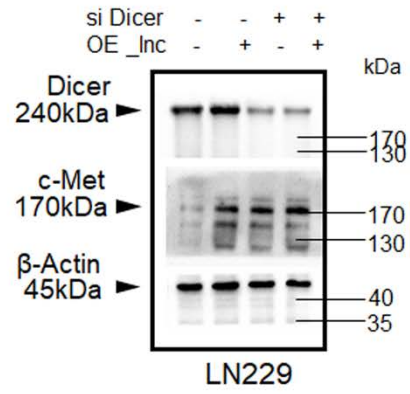

**Supplementary Figure 5K**

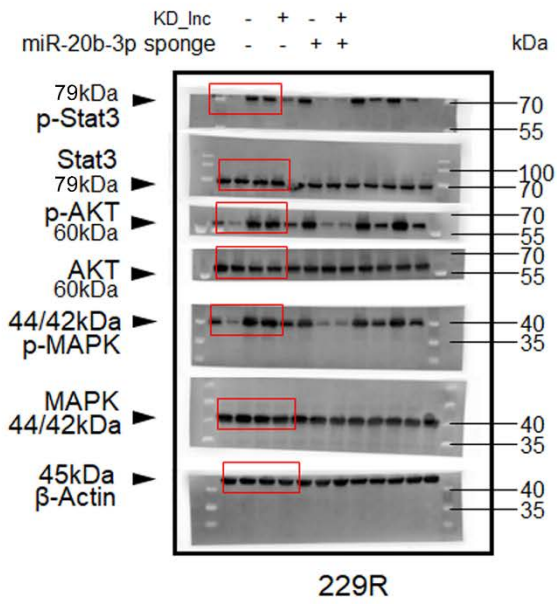

**Supplementary Figure 5L**

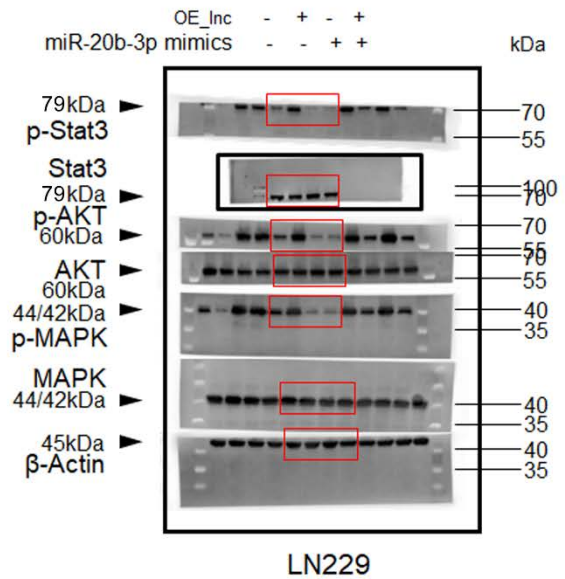

**Supplementary Figure 6C**

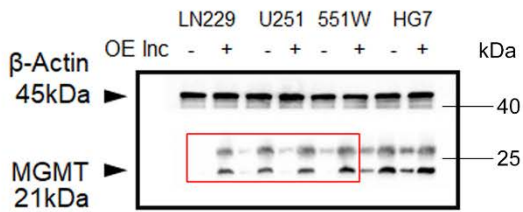

Supplementary Figure 6D

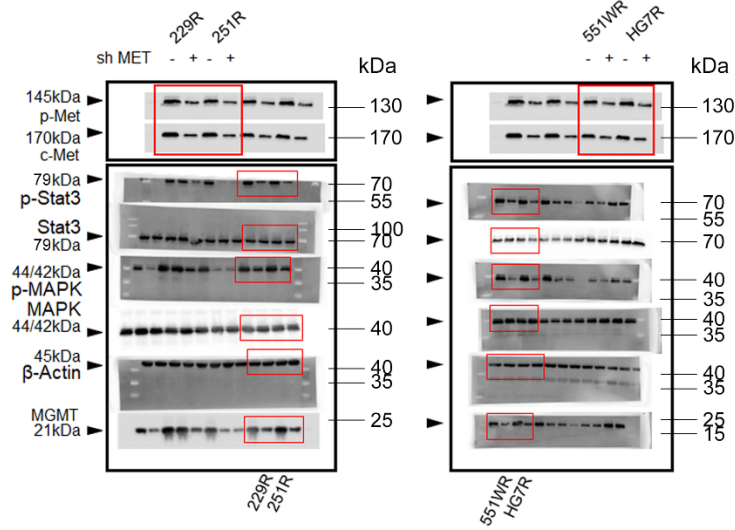

Supplementary Figure 6E

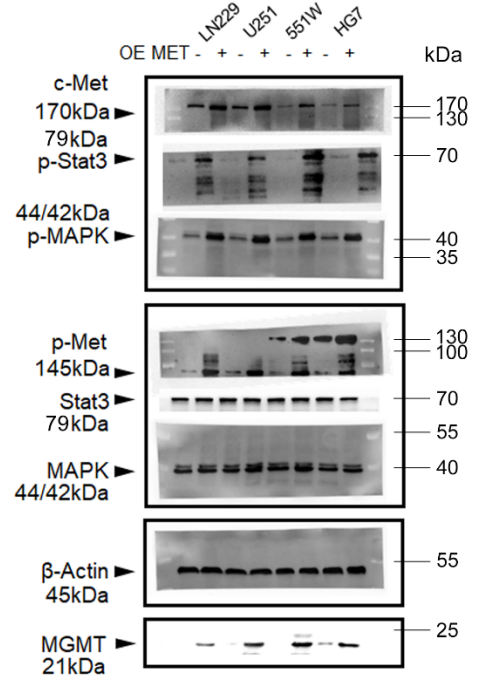

Supplementary Figure 6G

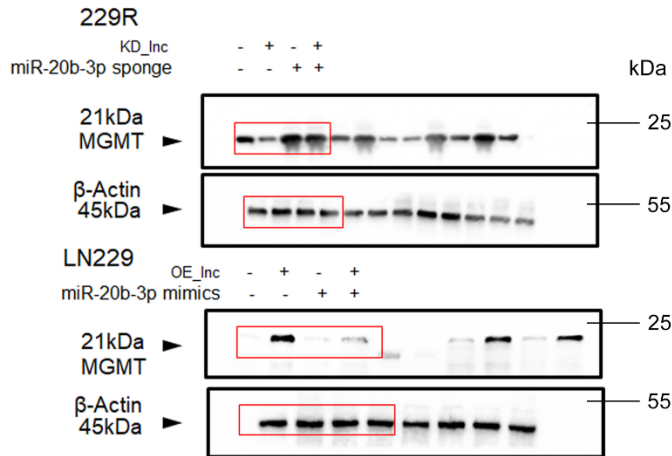

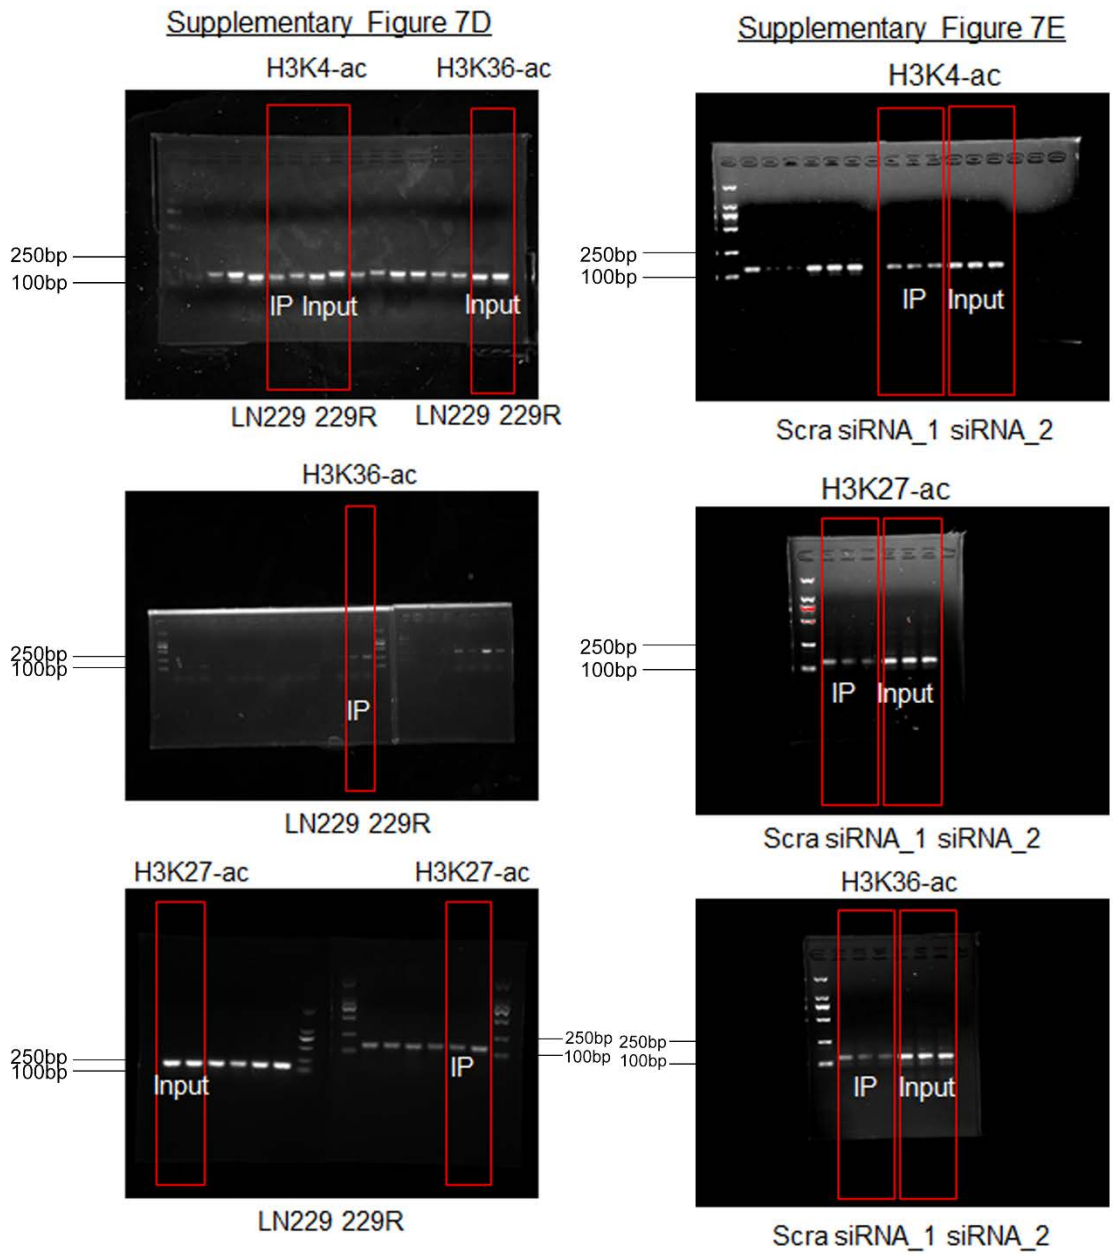

**Supplementary Figure 9. Uncropped blots.**

Uncropped images of all blots shown in main and supplementary figures. Molecular weight markers are indicated on the right side of each blot, whereas predicted molecular weight of the protein of interest indicated by an arrow on the left.

**Supplementary Table 1. Predicted DNA binding elements of lnc-TALC gene for FOX families in the JASPAR database**

| <b>Matrix ID</b> | <b>Name</b> | <b>Score</b> | <b>Relative score</b> | <b>Sequence ID</b>        | <b>Start</b> | <b>End</b> | <b>Predicted sequence</b> |
|------------------|-------------|--------------|-----------------------|---------------------------|--------------|------------|---------------------------|
| MA0157.1         | FOXO3       | 10.2323      | 0.935849513           | hg38_refGene_NM_001282748 | 387          | 394        | TCTAAACA                  |
| MA0157.1         | FOXO3       | 10.2054      | 0.934945143           | hg38_refGene_NM_001282748 | 832          | 839        | GGAAAACA                  |

**Supplementary Table 2. Predicted miRNAs targeting to lnc-TALC and MET**

| DIANA & RegRNA2.0                   | Targetscan & miRwalk & RegRNA & miRNA.org |
|-------------------------------------|-------------------------------------------|
| 17 common miRNAs targeting lnc-TALC | 72 common miRNAs targeting MET            |
| hsa-miR-571                         | hsa-miR-335-3p                            |
| hsa-miR-3680-3p                     | hsa-miR-33a-3p                            |
| hsa-miR-1224-5p                     | hsa-miR-300                               |
| hsa-miR-1276                        | hsa-miR-205-3p                            |
| hsa-miR-142-3p                      | hsa-let-7f-1-3p                           |
| hsa-miR-302f                        | hsa-miR-361-5p                            |
| hsa-miR-3147                        | hsa-miR-206                               |
| hsa-miR-324-5p                      | hsa-let-7b-3p                             |
| hsa-miR-338-3p                      | hsa-miR-1284                              |
| hsa-miR-4259                        | hsa-miR-130a-3p                           |
| hsa-miR-4263                        | hsa-miR-34c-5p                            |
| hsa-miR-4310                        | hsa-miR-449a                              |
| hsa-miR-576-3p                      | hsa-miR-514b-5p                           |
| hsa-miR-657                         | hsa-miR-34b-3p                            |
| hsa-miR-20b-3p                      | hsa-miR-194-3p                            |
| hsa-miR-335-3p                      | hsa-miR-4307                              |
| hsa-miR-380-3p                      | hsa-miR-16-1-3p                           |
|                                     | hsa-miR-195-3p                            |
|                                     | hsa-miR-4302                              |
|                                     | hsa-miR-16-2-3p                           |
|                                     | hsa-miR-1205                              |
|                                     | hsa-miR-4273                              |
|                                     | hsa-miR-1912                              |
|                                     | hsa-miR-1272                              |
|                                     | hsa-miR-4255                              |
|                                     | hsa-miR-337-3p                            |
|                                     | hsa-miR-508-3p                            |
|                                     | hsa-miR-198                               |
|                                     | hsa-miR-1263                              |
|                                     | hsa-miR-338-5p                            |
|                                     | hsa-let-7f-2-3p                           |
|                                     | hsa-miR-1262                              |
|                                     | hsa-miR-183-3p                            |
|                                     | hsa-miR-520h                              |
|                                     | hsa-miR-2278                              |
|                                     | hsa-miR-1267                              |
|                                     | hsa-miR-30b-3p                            |
|                                     | hsa-miR-4277                              |
|                                     | hsa-miR-141-3p                            |
|                                     | hsa-miR-3167                              |
|                                     | hsa-miR-1204                              |
|                                     | hsa-miR-2113                              |
|                                     | hsa-miR-340-3p                            |
|                                     | hsa-miR-148a-3p                           |
|                                     | hsa-miR-3165                              |
|                                     | hsa-miR-520d-5p                           |
|                                     | hsa-miR-1290                              |
|                                     | hsa-miR-485-5p                            |
|                                     | hsa-miR-185-3p                            |
|                                     | hsa-miR-1206                              |
|                                     | hsa-miR-26b-3p                            |
|                                     | hsa-miR-30a-3p                            |
|                                     | hsa-miR-30e-3p                            |
|                                     | hsa-miR-3138                              |
|                                     | hsa-miR-1972                              |
|                                     | hsa-miR-3143                              |
|                                     | hsa-miR-2117                              |
|                                     | hsa-miR-1293                              |
|                                     | hsa-miR-342-5p                            |
|                                     | hsa-miR-3128                              |
|                                     | hsa-miR-15a-3p                            |
|                                     | hsa-miR-3188                              |
|                                     | hsa-miR-3130-3p                           |
|                                     | hsa-miR-20b-3p                            |
|                                     | hsa-miR-4303                              |
|                                     | hsa-miR-509-3p                            |
|                                     | hsa-miR-4327                              |
|                                     | hsa-miR-30c-1-3p                          |
|                                     | hsa-miR-30c-2-3p                          |
|                                     | hsa-miR-3122                              |
|                                     | hsa-miR-4283                              |
|                                     | hsa-miR-4314                              |

**Supplementary Table 3. Clinical characteristics of primary and paired recurrent GBM patients**

| ID    | Age | Gender | TMZ | Radiotherapy | KPS |
|-------|-----|--------|-----|--------------|-----|
| #1613 | 48  | F      | 1   | 1            | 100 |
| #1405 | 54  | M      | 1   | 1            | 80  |

**Supplementary Table 4. Summary of clinical GBM patients**

| Variables    |        | Low lnc-TALC expression (n=38) |           |         | High lnc-TALC expression (n=39) |           |         |
|--------------|--------|--------------------------------|-----------|---------|---------------------------------|-----------|---------|
|              |        | Yes (n=22)                     | No (n=16) | P-value | Yes (n=18)                      | No (n=21) | P-value |
| Temozolomide | Female | 12                             | 7         | 0.511   | 7                               | 11        | 0.399   |
|              | Male   | 10                             | 9         |         | 11                              | 10        |         |
| Age          | < 45   | 15                             | 8         | 0.258   | 6                               | 5         | 0.51    |
|              | ≥45    | 7                              | 8         |         | 12                              | 16        |         |
| KPS_Score    | ≤70    | 6                              | 4         | 1       | 2                               | 1         | 0.889   |
|              | > 70   | 16                             | 12        |         | 16                              | 20        |         |
| Radiotherapy | Yes    | 11                             | 9         | 0.703   | 18                              | 0         | 0.001   |
|              | No     | 11                             | 7         |         | 0                               | 21        |         |

**Supplementary Table 5. Cox regression analysis of GBM with low lnc-TALC expression**

| Variables    | Uni Cox regression |              |         | Mul Cox regression |             |         |
|--------------|--------------------|--------------|---------|--------------------|-------------|---------|
|              | HR                 | 95%CI        | p_value | HR                 | 95%CI       | p_value |
| Gender       | 0.750              | 0.297-1.890  | 0.542   |                    |             |         |
| Age          | 3.778              | 1.355-10.528 | 0.011   | 2.545              | 0.903-7.172 | 0.077   |
| KPS_Score    | 0.268              | 0.088-0.814  | 0.020   | 0.199              | 0.061-0.650 | 0.008   |
| Temozolomid  | 0.268              | 0.095-0.756  | 0.013   | 0.287              | 0.095-0.866 | 0.027   |
| Radiotherapy | 0.639              | 0.249-1.637  | 0.351   |                    |             |         |

HR, hazard ratio; CI, confidence interval; KPS\_Score, Karnofsky Performance Score (≤70 vs. >70); Age (<45 vs. ≥45 years); Gender (Female or Male); Temozolomide (Yes or No); Radiotherapy (Yes or No).





**Supplementary Table 7. The gene-specific primers used for the nested-PCR of the RACE analysis on lnc-TALC**

| Gene specific primer | Sequence                      |
|----------------------|-------------------------------|
| 3' RACE GSP1         | CCAACTCAACTGGCTGGTCCTCAATG    |
| 3' RACE GSP2         | TGGTAACATGTCATTATAAGTCTGAAGAT |
| 5' RACE GSP1         | GCTCTCTGACTTTTTTTGCAGGTTGTCTG |
| 5' RACE GSP2         | CTTCATGCTCTGTAGAAACTGTAGTGTAT |

**Supplementary Table 8. Sequences of siRNA against specific targets**

|                              |                    |                       |                         |
|------------------------------|--------------------|-----------------------|-------------------------|
| Dicer siRNA                  | Sense (5'-3')      | GGGCACCCAUCUCUAAUUA   |                         |
|                              | Anti-sense (5'-3') | UAAUUAGAGAUGGGUGCCC   |                         |
| AKT siRNA                    | Sense (5'-3')      | CCUGCCCUUCUACAACCAGGA | UACUCAAACUCGUUCAUGGUC   |
|                              | Anti-sense (5'-3') | UCCUGGUUGUAGAAGGGCAGG | CCAUGAACGAGUUUGAGUACC   |
| MGMT siRNA                   | Sense (5'-3')      | UUUCAUUUCACAAUCCUUGUC |                         |
|                              | Anti-sense (5'-3') | CAAGGAUUGUGAAAUGAAACG |                         |
| Stat3 siRNA                  | Sense (5'-3')      | AGAAAUGAAGGCAAAACGGGG | UUAUGAAACACCAAAGUGGCA   |
|                              | Anti-sense (5'-3') | CCGUUUUGCCUUCAUUUCUAA | CCACUUUGGUGUUUCAUAAUC   |
| MAPK siRNA                   | Sense (5'-3')      | UGGUUUUUGGGGAAAUACCAG |                         |
|                              | Anti-sense (5'-3') | GGUAUUUCCCCAAAAACCACC |                         |
| lnc-TALC siRNA               | Sense (5'-3')      | AUAAUGACAUGUACCAAGAG  | UUCAAAUGGCAAUCUUCAGAC   |
|                              | Anti-sense (5'-3') | CUUGGUAACAUGUCAUUUAAA | CUGAAGAUUGCCAUUUUGAAAU  |
| lnc-ERC1-1:5 siRNA           | Sense (5'-3')      | UUUUGAGAUGGAGUUUCGCUC | UUUUUUUUUUUUUGAGAUGGA   |
|                              | Anti-sense (5'-3') | GCGAAACUCCAUCUCAAAAAA | CAUCUCAAAAAAAAAAAAAAAAA |
| lnc-RP11-15K19.2.1-3:6 siRNA | Sense (5'-3')      | ACAAAAUCAGUGAUUACCAU  | AUGACAAUGGAUGUUUUCUU    |
|                              | Anti-sense (5'-3') | GGUAUAUCACUGAUUUUGUAG | GAAUAACAUCCAUUGUCAUAC   |
| lnc-SCG3-3:3 siRNA           | Sense (5'-3')      | UAAAAAGUCACCAAGUAACUU | UCCUUUUUCUCCUUUUGGGCC   |
|                              | Anti-sense (5'-3') | GUUACUUGGUGACUUUUUAUG | CCCAAAGGAGAAAAAGGAGC    |
| NR_028415 siRNA              | Sense (5'-3')      | AAUUUUUAACACCUAAUGCUA | UGUUCAAGGCCACAAUCCAG    |
|                              | Anti-sense (5'-3') | GCAUUAGGUGUUAAAAUUUAU | GGAUUGUGGGCCUUGAACAUG   |
| NR_036444 siRNA              | Sense (5'-3')      | ACAUUGUCUUGAAAUUUGGGU | AUUUCACUUGGUAUCUUCGGA   |
|                              | Anti-sense (5'-3') | CCAAAUUUCAAGACAAUGUUG | CGAAGAUACCAAGUGAAAUAC   |
| ENST00000602425 siRNA        | Sense (5'-3')      | AAUGUGUAACUUAUCAGGUG  | UAAAAUGGGGUAGUACAGCA    |
|                              | Anti-sense (5'-3') | CCUGAUAAGUUAUCACAUUGG | CUGUUACUACCCCAUUUUACA   |
| NONHSAT025399 siRNA          | Sense (5'-3')      | UGUUCAAGGCCACAAUCCAG  | AUCAAUGAGCCCUUAAGCAG    |
|                              | Anti-sense (5'-3') | GGAUUGUGGGCCUUGAACAUG | GCUUAAGGGCUCAUUUGAUGU   |
| ENST00000549807 siRNA        | Sense (5'-3')      | UGACUUACAAUGAAAUCAGUA | AAGGUUUUUUUAGAUUGGAC    |
|                              | Anti-sense (5'-3') | CUGAUUUCAUUGUAAGUCACA | CACAUCUAAAAAAAAUACCUUCA |
| lnc-HIST1H2BI-1:1 siRNA      | Sense (5'-3')      | ACAAGUAUUUAAAUACUUCAC | UAGAUUAUAAGAGUUUAGCUC   |
|                              | Anti-sense (5'-3') | GAAGUAUUUAAAUACUUGUUU | GCUAAACUCUUUAAAUCUAUA   |

**Supplementary Table 9. Sequences of sgRNA for knockdown of lnc-TALC**

|        |                      |
|--------|----------------------|
| sgRNA1 | TAGCATGCATAGCATAAATC |
| sgRNA2 | AATGGATTTCCAACGAGTTC |
| sgRNA3 | ATCCACATTCCAGAACTCGT |
| sgRNA4 | ATATTGCACTTAAGGATAGG |

**Supplementary Table 10. Primary antibodies used in the present study**

| <b>Antigens</b>         | <b>Manufacturer</b>       | <b>Catalogue numbers</b> | <b>Application</b>                         |
|-------------------------|---------------------------|--------------------------|--------------------------------------------|
| c-Met                   | Cell Signaling Technology | #8198                    | 1:1000 for WB, 1:100 for IHC               |
| p-Met(Tyr1234/1235)     | Cell Signaling Technology | #3077                    | 1:1000 for WB                              |
| AKT                     | Cell Signaling Technology | #4685                    | 1:1000 for WB                              |
| p-AKT(S473)             | Cell Signaling Technology | #4060                    | 1:1000 for WB, 1:200 for IHC               |
| MAPK                    | Cell Signaling Technology | #4695                    | 1:1000 for WB                              |
| p-MAPK(Thr 202/Tyr 204) | Cell Signaling Technology | #4370                    | 1:1000 for WB, 1:200 for IHC               |
| STAT3                   | Cell Signaling Technology | #9139                    | 1:1000 for WB                              |
| p-STAT3(Y705)           | Cell Signaling Technology | #9145                    | 1:1000 for WB, 1:200 for IHC, 1:50 for IP  |
| MGMT                    | Abcam                     | ab39253                  | 1:500 for WB, 1:100 for IF, 1:50 for IHC   |
| FOXO3                   | Abcam                     | ab12162                  | 1:1000 for WB, 1:200 for IF, 1:50 for ChIP |
| Ago2                    | Abcam                     | ab32381                  | 1:50 for RIP                               |
| Dicer                   | Cell Signaling Technology | #5362                    | 1:1000 for WB                              |
| $\beta$ -Actin          | Zsbio Store               | PR-0255                  | 1:1000 for WB                              |
| H3K4 (ac)               | Abcam                     | ab176799                 | 1:50 for ChIP                              |
| H3K9 (ac)               | Abcam                     | ab4441                   | 1:50 for ChIP                              |
| H3K27 (ac)              | Abcam                     | ab4729                   | 1:50 for ChIP                              |
| H3K36 (ac)              | Abcam                     | ab177179                 | 1:50 for ChIP                              |
| p300                    | Abcam                     | ab14984                  | 1:50 for ChIP, 1:50 for IP                 |

**Supplementary Table 11. Sequences of primers used for qRT-PCR**

|                    |                 |                                   |
|--------------------|-----------------|-----------------------------------|
| lnc-TALC           | Forward (5'-3') | CTGGTCCTCAATGCTGCCT               |
|                    | Reverse (5'-3') | ATCCAGGGTTGACTTCGCAT              |
| MET                | Forward (5'-3') | AGTGAGAAGGCTAAAGGAAACG            |
|                    | Reverse (5'-3') | TTTGGACCGTCAAGAAGTAAAT            |
| MGMT               | Forward (5'-3') | AGGAGCGATGAGGAGCAATC              |
|                    | Reverse (5'-3') | GGCACCGTCACTGCGAAT                |
| $\beta$ -Actin     | Forward (5'-3') | AATCGTGCGTGACATTAAGGAG            |
|                    | Reverse (5'-3') | ACTGTGTTGGCGTACAGGTCTT            |
| lnc-ERC1-1:5       | Forward (5'-3') | CCCAAGTGTCCAGCTACAGA              |
|                    | Reverse (5'-3') | TCGCTCGTCTAAGTGGGATC              |
| lnc-RP11-15K19.2.1 | Forward (5'-3') | ACAGCTCCAAACAACCTCAGA             |
|                    | Reverse (5'-3') | ACAAAACCTCTCCAGGAAATCGA           |
| lnc-SCG3-3:3       | Forward (5'-3') | TTATGAGCAGGCCATCACCA              |
|                    | Reverse (5'-3') | ACCCTCTGTCTTTGAGCTCC              |
| NR_028415          | Forward (5'-3') | GCGATTCTGCGTCACTGAAC              |
|                    | Reverse (5'-3') | CCTCAGGCCGAGGAAATCAG              |
| NR_036444          | Forward (5'-3') | TAGAAGTAGGAGCCTGCACG              |
|                    | Reverse (5'-3') | ACCTAGGTTGTCTCCACTGC              |
| ENST00000602425    | Forward (5'-3') | TTCCCAAAGATTCCCTCCGCT             |
|                    | Reverse (5'-3') | AATCGCACATTGGGCTGTTT              |
| NONHSAT025399      | Forward (5'-3') | GGAGGCAAACGCTCAGAATC              |
|                    | Reverse (5'-3') | TGGCCACTGAAGTCTAGGTG              |
| ENST00000549807    | Forward (5'-3') | GCTCAAACCTGCAAAAGGGGA             |
|                    | Reverse (5'-3') | TACGTAATCTTCCCAGGGCC              |
| lnc-HIST1H2BI-1:1  | Forward (5'-3') | AACTTTGCCCAACAGCTTGT              |
|                    | Reverse (5'-3') | GTTTTCTGTGGGCCGAGTG               |
| U6                 | Forward (5'-3') | CTCGCTTCGGCAGCACA                 |
|                    | Reverse (5'-3') | AACGCTTCACGAATTTGCGT              |
| miRNA-648          | Forward (5'-3') | CACAGACACCTCCAAGTG                |
| miRNA-767-3p       | Forward (5'-3') | CCATGGTTGTCTGAGCA                 |
| miRNA-221          | Forward (5'-3') | GTCCAGTTTTTTTTTTTTTTTGAAC         |
| miRNA-181b         | Forward (5'-3') | ACACTCCAGCTGGGAACATTTCATTGCTGTCGG |
| miRNA-181d         | Forward (5'-3') | CTGGAGAACATTTCATTGTTGTC           |
| miRNA-20b-3p       | Forward (5'-3') | ATGCCAAAGTGCTCATAGT               |
| miRNA-335-3p       | Forward (5'-3') | TTTTTCATTATTGCTCCTGACC            |

**Supplementary Table 12. Sequences of predicted and mutant binding sites used for luciferase reporter assay**

| Name                         | Sequence                                                                                                                                                                                                                    |
|------------------------------|-----------------------------------------------------------------------------------------------------------------------------------------------------------------------------------------------------------------------------|
| MET-3'URT (miRNA-20b-3p)     | AGACAGGATCTCACTCTGTTGCCAGGGCTGTAGTGCAGTGGTGTGATCATAGCTCAC<br>TGCAACCTCCACCTCCCAGGCTCAAGCCTCCCGAATAGCTGGGACTACAGGCGCACA<br>CCACCATCCCCGGCTAATTTTTGTATTTTTGTAGAGACGGGGTTTTGCCATGTTGCC<br>AAGGCTGGTTTCAAACCTCTGGACTCAAGAAATCC  |
| MET-3'URT-Mut (miRNA-20b-3p) | AGACAGGATCTCACTCTGTTGCCAGGGCTGTAGTGCAGTGGTGTGATCATAGCTCAC<br>TGCAACCTCCACCTCCCAGGCTCAAGCCTCCCGAATAGCTGGGACTACAGGCGCACA<br>CCACCATCCCCGGCTAATTTTTGTATTTTTGTAGAGACGGGGTTTTGCCATGTTGCC<br>AAGGCTGGTTTCAAACCTCTGGACTCAAGAAATCC  |
| lnc-TALC (miRNA-20b-3p)      | TCTGAAGATTGCCATTTGAAATGCTCTTTGAGGGATGCGAAGTCAACCCTGGATCCA<br>AAGTAGCTTTGATGTTTGTGTCAGGAAAATGCTGGAATTCTATACACTACAGTTTCTACA<br>GAGCATGAAGAACTCCAACCTTCAGACAACCTGCAAAAAAAGTCAGAGAGCAATTAA<br>ATATAAAAATAAAATTCCTTTGATAAAAACAAA |
| lnc-TALC-Mut (miRNA-20b-3p)  | TCTGAAGATTGCCATTTGAAATGCTCTTTGAGGGATGCGAAGTCAACCCTGGATCCA<br>AAGTAGCTTTGATGTTTGTGTCAGGAAAATGCTGGAATTCTATACCAGCACTTTTAGCA<br>CTAGCATGAAGAACTCCAACCTTCAGACAACCTGCAAAAAAAGTCAGAGAGCAATTA<br>AATATAAAAATAAAATTCCTTTGATAAAAACAAA |
| MET-3'URT (miRNA-335-3p)     | AGACATCATAGTGCTAGTACTATGTCAAAGCAACAGTCCACACTTTGTCCAATGGTT<br>TTTCACTGCCTGACCTTTAAAAGGCCATCGATATTCTTTGCTCTTGCCAAAATTGCA<br>CTATTATAGGACTTGTATTGTTATTTAAATTACTGGATTCTAAGGAATTTCTTATCTG<br>ACAGAGCATCAGAACCAGAGGCTTGGTCCCACA   |
| MET-3'URT-Mut (miRNA-335-3p) | AGACATCATAGTGCTAGTACTATGTCAAAGCAACAGTCCACACTTTGTCCAATGGTT<br>TTTCACTGCCTGACCTTTAAAAGGCCATCGATATTCTTTAGAGGTCCAAAATTGCA<br>CTATTATAGGACTTGTATTGTTATTTAAATTACTGGATTCTAAGGAATTTCTTATCTG<br>ACAGAGCATCAGAACCAGAGGCTTGGTCCCACA    |
| lnc-TALC (miRNA-335-3p)      | TCTGAAGATTGCCATTTGAAATGCTCTTTGAGGGATGCGAAGTCAACCCTGGATCCA<br>AAGTAGCTTTGATGTTTGTGTCAGGAAAATGCTGGAATTCTATACACTACAGTTTCTACA<br>GAGCATGAAGAACTCCAACCTTCAGACAACCTGCAAAAAAAGTCAGAGAGCAATTAA<br>ATATAAAAATAAAATTCCTTTGATAAAAACAAA |
| lnc-TALC-Mut (miRNA-335-3p)  | TCTGAAGATTGCCATTTGAAATGCTCTTTGAGGGATGCGAAGTCAACCCTGGATCCA<br>AAGTAGCTTTGATGTTTGTGTCAGGAAAATGCTGGAATTCTATACACTACAGTTTCTACA<br>GAGCATGAAGAACTCCAACCTTCAGACAACCTGCAAAAAAAGGACTATCTACCGTAA<br>ATCGACCCCTAAATTCCTTTGATAAAAACAAA  |

**Supplementary Table 13. Probes sequence for lnc-TALC**

5'-TTTTTTGCAGGTTGTCTGAAGTTGGAGTTCTTCATGCTCTGTAGAACTGTAGTGTATAG-3'

**Supplementary Table 14. Sequences of primers used for ChIP-PCR**

| Primer            | Sequence                                                                |
|-------------------|-------------------------------------------------------------------------|
| MGMT_primer       | Forward 5'GCAGCCTGTATTGTCACCAG 3'<br>Reverse 5'CGGTGAAGTTCCCTGTTGG 3'   |
| lnc-TALC_primer 1 | Forward 5'AATTAGTCCGCATTCCTGGC 3'<br>Reverse 5'TGGCGGCAAAAATAAAGAGGG 3' |
| lnc-TALC_primer 2 | Forward 5'GCTAAGGAACGTCAGCCAAG 3'<br>Reverse 5'TGCCATCATTCACTGCTG 3'    |
| lnc-TALC_primer 3 | Forward 5'AGATCGTTGCTGTGAAGTGAAAA 3'<br>Reverse 5'CTCTGCGTCCCCTCCAAA 3' |
